# Supplementary material for: Hepatoprotective Effects of Steamed and Freeze-Dried Mature Silkworm Larval Powder against Ethanol-Induced Fatty Liver Disease in Rats
Source: PubMed Central journal article supplement (PMC7142575; doi:10.3390/foods9030285), 2020-03-04
Supplement: foods-09-00285-s001.pdf [file foods-09-00285-s001.pdf]

**Table S1.** The nutrient composition of SMSP.

| Nutrient (unit)                | SMSP                                       |            |        |
|--------------------------------|--------------------------------------------|------------|--------|
| Proximal analysis<br>(g/100 g) | Water                                      | 2.85       |        |
|                                | Crude protein                              | 68.66      |        |
|                                | Crude fat                                  | 10.99      |        |
|                                | Crude ash                                  | 3.26       |        |
|                                | Crude fiber                                | 1.77       |        |
| Amino acids (%)                | Glycine                                    | 12.335     |        |
|                                | Alanine                                    | 9.778      |        |
|                                | Serine                                     | 6.757      |        |
|                                | Aspartic acid                              | 4.679      |        |
|                                | Tyrosine                                   | 4.560      |        |
|                                | Glutamic acid                              | 3.824      |        |
|                                | Valine                                     | 2.399      |        |
|                                | Lysine                                     | 2.193      |        |
|                                | Threonine                                  | 2.185      |        |
|                                | Leucine                                    | 1.983      |        |
|                                | Arginine                                   | 1.958      |        |
|                                | Phenylalanine                              | 1.746      |        |
|                                | Isoleucine                                 | 1.214      |        |
|                                | Proline                                    | 1.148      |        |
|                                | Histidine                                  | 1.083      |        |
| Vitamins                       | Methionine                                 | 0.644      |        |
|                                | Cysteine                                   | 0.427      |        |
|                                | Tryptophane                                | 0.425      |        |
|                                | Vitamin A ( $\mu\text{g}/100\text{ g}$ )   | 576.80     |        |
|                                | Vitamin B1 ( $\text{mg}/100\text{ g}$ )    | 0.26       |        |
|                                | Vitamin B2 ( $\text{mg}/100\text{ g}$ )    | 3.67       |        |
|                                | Vitamin B6 ( $\text{mg}/100\text{ g}$ )    | 0.35       |        |
|                                | Vitamin B12 ( $\mu\text{g}/100\text{ g}$ ) | 0.00       |        |
|                                | Niacin ( $\text{mg}/100\text{ g}$ )        | 1.28       |        |
| Minerals (mg/100 g)            | Folic acid ( $\text{mg}/100\text{ g}$ )    | 0.40       |        |
|                                | Biotin ( $\mu\text{g}/100\text{ g}$ )      | 0.00       |        |
|                                | Vitamin C ( $\text{mg}/100\text{ g}$ )     | 12.62      |        |
|                                | Polyphenols ( $\text{mg}/100\text{ g}$ )   | Flavonoids | 380.16 |
|                                | Potassium (K)                              | 1045.4     |        |
|                                | Phosphorus (P)                             | 688.27     |        |
|                                | Sulfur (S)                                 | 326.45     |        |
|                                | Magnesium (Mg)                             | 199.25     |        |
|                                | Calcium (Ca)                               | 198.90     |        |
|                                | Sodium (Na)                                | 14.93      |        |
|                                | Zinc (Zn)                                  | 5.76       |        |
|                                | Iron (Fe)                                  | 3.17       |        |
|                                | Manganese (Mn)                             | 1.60       |        |
| Copper (Cu)                    | 1.20                                       |            |        |
| Chromium (Cr)                  | 0.00                                       |            |        |
| Lead (Pb)                      | 0.00                                       |            |        |
| Cadmium (Cd)                   | 0.00                                       |            |        |
| Mercury (Hg)                   | 0.00                                       |            |        |
| Arsenic (As)                   | 0.00                                       |            |        |
| Fatty acids (%)                | Myristic acid (C14:0)                      | 0.17       |        |
|                                | Palmitic acid (C16:0)                      | 24.49      |        |
|                                | Stearic acid (C18:0)                       | 8.55       |        |

---

|                                    |        |
|------------------------------------|--------|
| Oleic acid (C18:1n-9)              | 31.22  |
| Palmitoleic acid (C16:1n-7)        | 0.86   |
| Linolenic acid (C18:3n-3)          | 27.86  |
| Linoleic acid (C18:2n-6)           | 6.50   |
| Eicosenoic acid (C20:1n-9)         | 0.23   |
| $\gamma$ -Linoleic acid (C18:3n-6) | 0.13   |
| Vaccenic acid (C18:1n-7)           | 0.00   |
| Eicosatrienoic acid (C20:3n-3)     | 0.00   |
| Eicosapentaenoic acid (C20:5n-3)   | 0.00   |
| Docosatetraenoic acid (C22:4n-6)   | 0.00   |
| Docosahexaenoic acid (C22:6n-3)    | 0.00   |
| Total                              | 100.00 |
| ▪ Saturated fatty acids            | 33.21  |
| ▪ Unsaturated fatty acids          | 66.79  |
| ▪ Mono-unsaturated                 | 32.31  |
| ▪ Poly-unsaturated                 | 34.49  |
| ▪ n-6/n-3                          | 0.24   |

---
